# Supplementary material for: Serum Progranulin Concentrations May Be Associated With Macrophage Infiltration Into Omental Adipose Tissue
Source: Oxford University Press journal article supplement (doi:10.2337/db08-1147), 2008-12-04
Supplement: db08-11471_suppl.doc [file db08-11471_suppl.doc]

**Supplementary Table 1**

Using six human serum samples intra-assay variation assessment was performed six times to calculate standard deviation (SD) and coefficient of variance (CV).

| **Sample** | **Mean (ng/ml)** | **SD (ng/ml)** | **CV (%)** |
| --- | --- | --- | --- |
| 1 | 129.31 | 4.90 | 3.79 |
| 2 | 137.48 | 7.75 | 5.63 |
| 3 | 128.25 | 8.89 | 6.93 |
| 4 | 248.28 | 15.70 | 6.32 |
| 5 | 144.99 | 7.36 | 5.08 |
| 6 | 95.54 | 2.88 | 3.02 |

**Supplementary Table 2**

Using six human serum samples inter-assay variation assessment was performed six times to calculate standard deviation (SD) and coefficient of variance (CV).

| **Sample** | **Mean (ng/ml)** | **SD (ng/ml)** | **CV (%)** |
| --- | --- | --- | --- |
| 1 | 133.81 | 9.52 | 7.115 |
| 2 | 149.66 | 8.28 | 5.532 |
| 3 | 128.45 | 9.41 | 7.324 |
| 4 | 220.68 | 10.396 | 4.711 |
| 5 | 140.61 | 9.21 | 6.549 |
| 6 | 92.23 | 6.50 | 7.046 |

**Supplementary Table 3**

The recovery of recombinant human progranulin spiked to two different levels in five different human serum samples throughout the range of assay was evaluated.

| **Sample No.** | **Average recovery (%)** | **Range (%)** |
| --- | --- | --- |
| 1 | 97.16 | 91-103 |
| 2 | 97.98 | 93-102 |
| 3 | 97.69 | 95-101 |
| 4 | 95.41 | 89-99 |
| 5 | 96.73 | 91-100 |

**Supplementary Table 4**

To assess the linearity of the assay, Three serum samples were pre-treated as described in the protocol, resulting in the final dilution of x200 (labeled in the table below as dilution; 1).

| **Sample No.** | **Serum**  **Dilution** | **Expected**  **(ng/ml)** | **Observed**  **(ng/ml)** | **% Of**  **Expected** |
| --- | --- | --- | --- | --- |
| 1 | 1 | 156.13 | 156.13 | 100 |
| 1/2 | 78.06 | 78.79 | 101 |
| 1/4 | 39.03 | 39.78 | 102 |

| 2 | 1 | 239.69 | 239.69 | 100 |
| --- | --- | --- | --- | --- |
| 1/2 | 119.84 | 111.94 | 93 |
| 1/4 | 59.92 | 57.27 | 96 |

| 3 | 1 | 165.84 | 165.84 | 100 |
| --- | --- | --- | --- | --- |
| 1/2 | 82.92 | 80.94 | 98 |
| 1/4 | 41.46 | 40.26 | 97 |

**% of expected = observed / expected x 100%**

**Supplementary Table 5**

**Progranulin ELISA specificity.** No cross-reactivity was noted by using mouse and rat sera. Seventeen recombinant proteins including both human and mouse adipokines or cytokines at concentrations of 10 ng/ml were examined for their cross-reactivity with the human progranulin ELISA system. N. R., no cross-reactivity

| **Analyte** | **Max. Conc.**  **(ng/ml)** | **Cross**  **Reactivity (%)** |
| --- | --- | --- |
| Human progranulin | 1 | 100 |
| Human RBP4 | 10 | N. R. |
| Human adiponectin | 10 | N. R. |
| Human visfatin | 10 | N. R. |
| Human leptin | 10 | N. R. |
| Human RELM β | 10 | N. R. |
| Human AGF | 10 | N. R. |
| Human FABP4 | 10 | N. R. |
| Human TNF-α | 10 | N. R. |
| Human IL-33 | 10 | N. R. |
| Human GPX3 | 10 | N. R. |
| Human resistin | 10 | N. R. |
| Human clusterin | 10 | N. R. |
| Human vaspin | 10 | N. R. |
| Human PAI1 | 10 | N. R. |
| Human ANGPTL3 | 10 | N. R. |
| Mouse visfatin | 10 | N. R. |
| Rat visfatin | 10 | N. R. |
